# Supplementary material for: A novel role for ezrin in breast cancer angio/lymphangiogenesis
Source: PubMed Central journal article supplement (PMC4303119; doi:10.1186/s13058-014-0438-2), 2014-09-18

# Figure S1-Cell-cell junction marker ZO-1 staining of lymphatic barrier

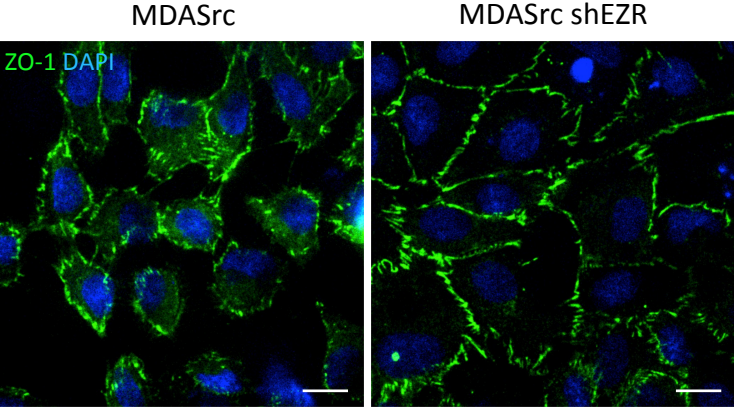

Supplement: 13058_2014_438_MOESM1_ESM.pdf [file 13058_2014_438_MOESM1_ESM.pdf]
