# Supplementary material for: A novel role for ezrin in breast cancer angio/lymphangiogenesis
Source: PubMed Central journal article supplement (PMC4303119; doi:10.1186/s13058-014-0438-2), 2014-09-18

# Figure S5-Reduced Src activity in *Ezrin*-deficient cells and decrease in VEGF-C / IL-6 secretion

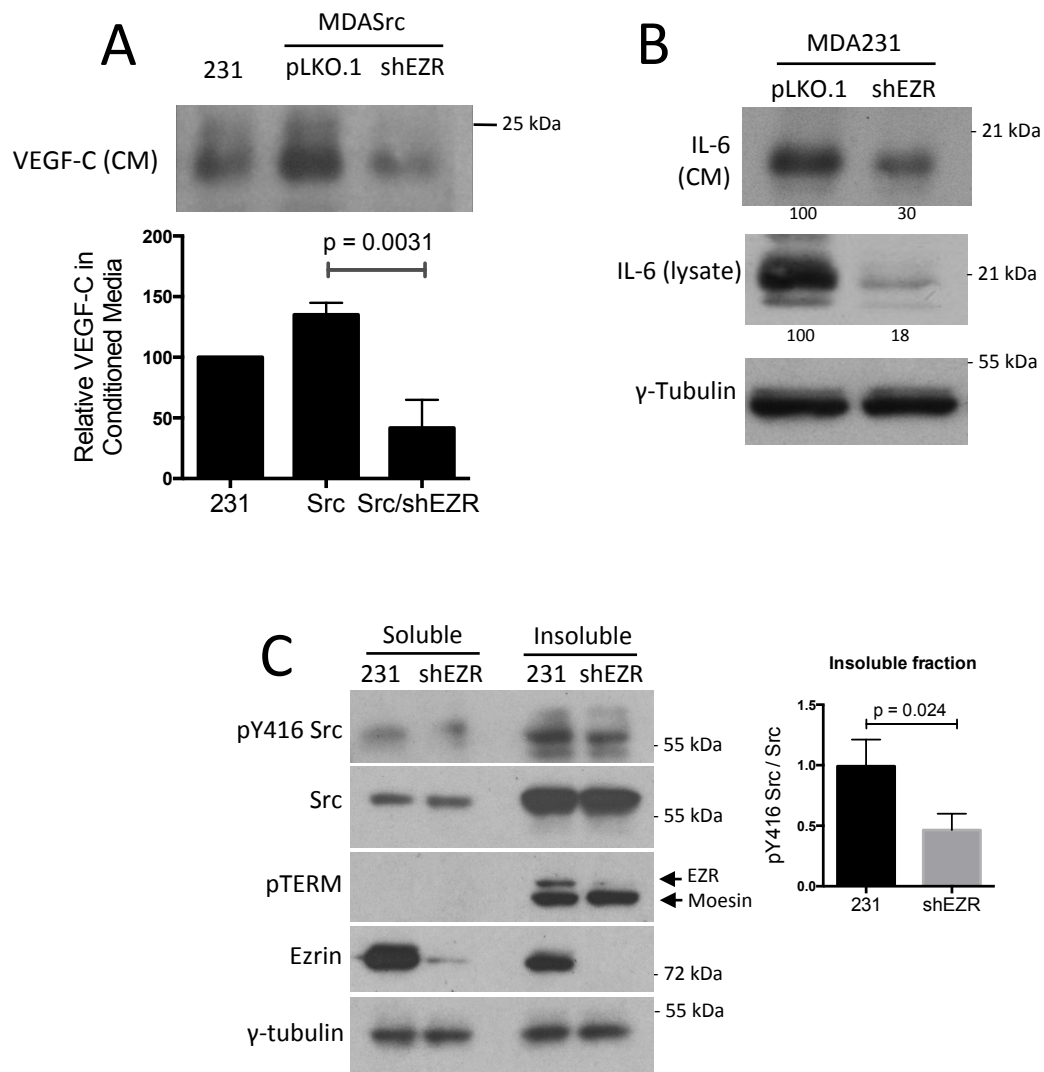

Supplement: 13058_2014_438_MOESM7_ESM.pdf [file 13058_2014_438_MOESM7_ESM.pdf]
